# Supplementary material for: A versatile tumor-targeted drug-delivery system based on IR808-modified nanoparticles, its co-loading with PTX and R848 and its extraordinary antitumor efficacy
Source: Royal Society of Chemistry journal article supplement (doi:10.1039/d4nr02837f), 2024-01-01
Supplement: d4nr02837f1.pdf [file d4nr02837f1.pdf]

## Supporting Information

### A one-for-all versatile tumor-targeted drug delivery system based on IR808-modified nanoparticles, its co-loading PTX and R848 and the extraordinary anti-tumor efficacy

Yaoyao Guo<sup>1,2</sup>, Manzhen Li<sup>1</sup>, Xinxin Liu<sup>1</sup>, Xi Wang<sup>1</sup>, Ziqi Zhang<sup>1</sup>, Dongchun Liu<sup>2,\*</sup> and Xiangtao Wang<sup>1,\*</sup>

<sup>1</sup> Institute of Medicinal Plant Development, Chinese Academy of Medical Sciences & Peking Union Medical College, Beijing 100193, China.

<sup>2</sup> School of Traditional Chinese Materia Medica, Shenyang Pharmaceutical University, Shenyang 110000, China.

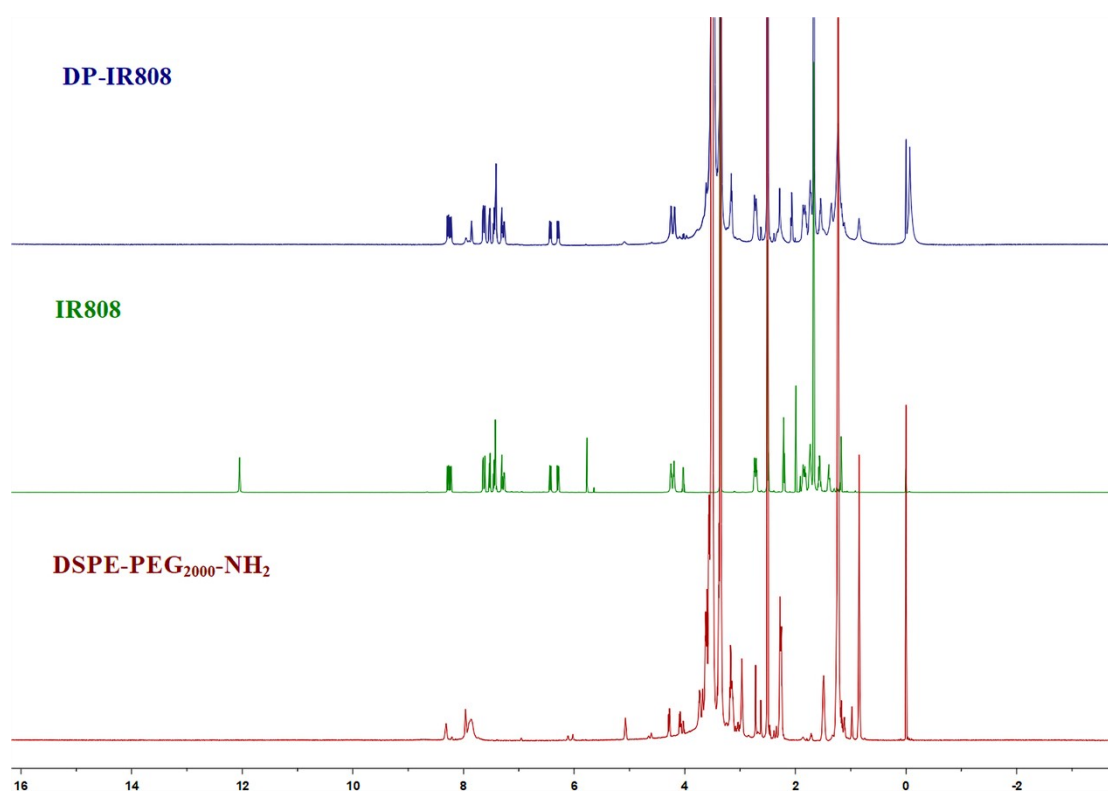

Fig. S1. <sup>1</sup>H NMR of the IR808, DSPE-PEG<sub>2000</sub>, DP-IR808

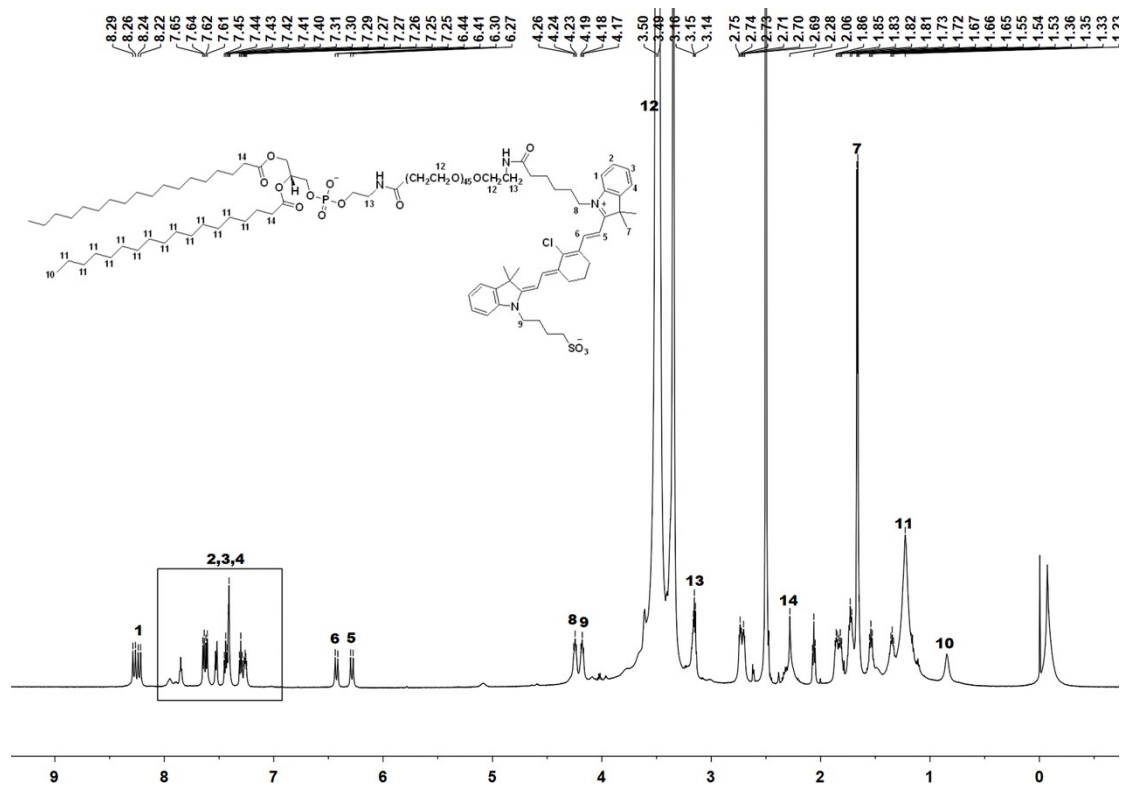

Fig. S2. <sup>1</sup>H NMR of the DP-IR808

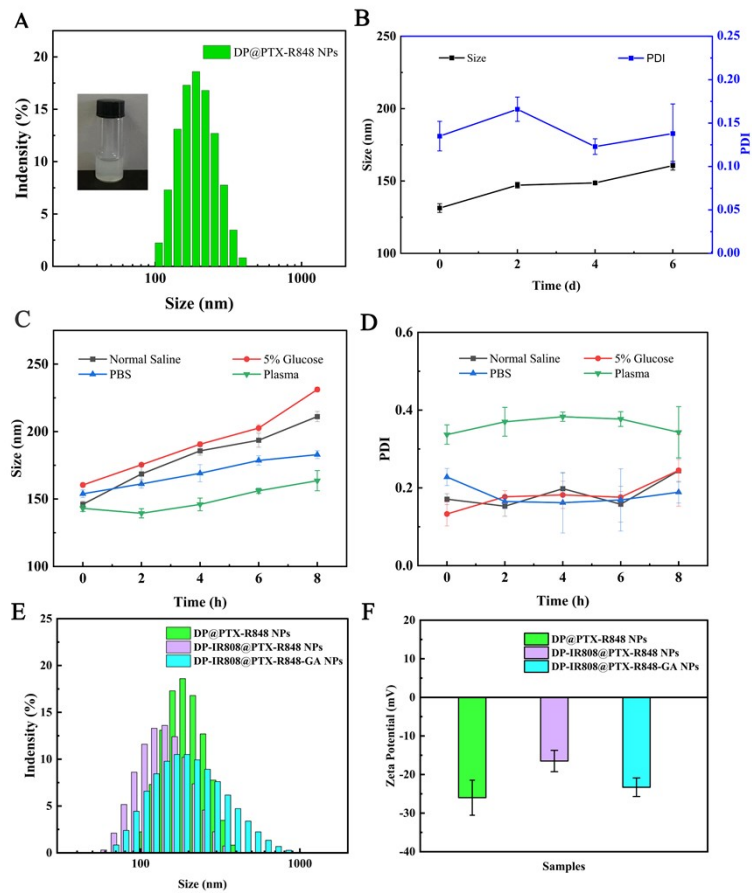

**Fig. S3** The size distribution curve and the actual photo of DP@PTX-R848NPs (A); The particle size change and PDI change of DP@PTX-R848 NPs at 4°C for 6 d (B); The particle size change (C) and PDI change (D) of DP @PTX-R848 NPs when incubated in physiological media; Particle size distribution measured by DLS (E) and zeta potential (F) of DP@PTX-R848NPs, DP-IR808@PTX-R848NPs and DP-IR808@PTX-R848-GANPs.

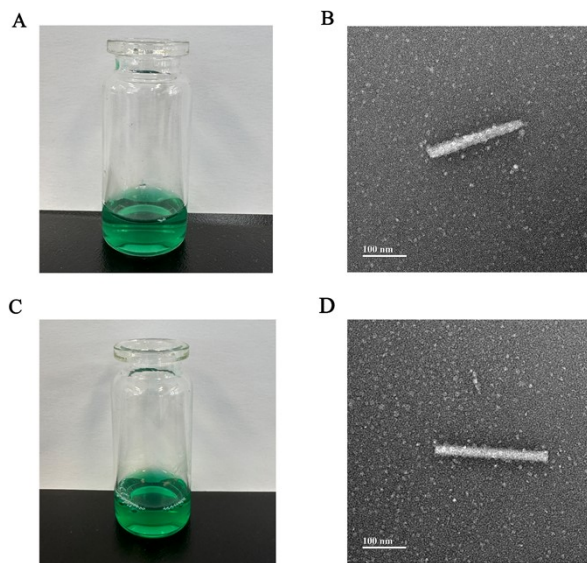

**Fig. S4** The actual photo (A) and TEM images (scale bar: 100 nm) (B) of DP-IR808@PTX-R848 NPs; The actual photo (C) and TEM images (scale bar: 100 nm) (D) of DP-IR808@PTX-R848 NPs after 808 nm laser treatment at 1W/cm<sup>2</sup> for 5 min.

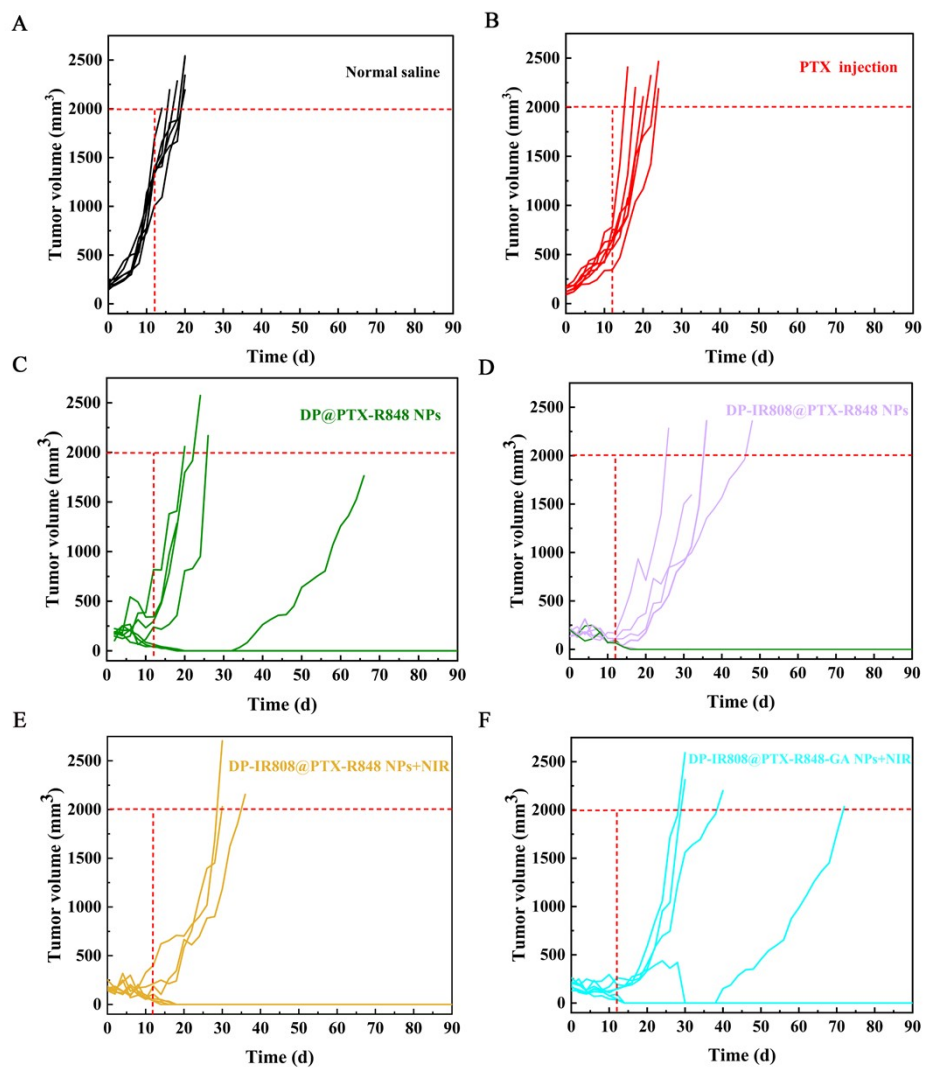

**Fig. S5** The tumor volume change curve of mice in each group ( $n = 7$ ).

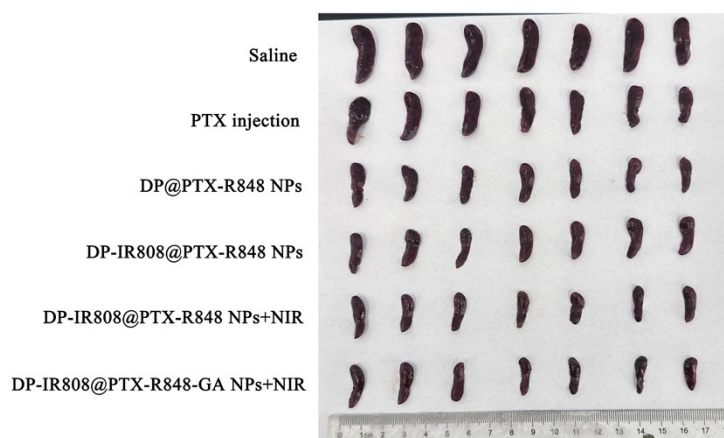

**Fig. S6** Representative images of spleen tissues.

**Table. S1.** Average particle size, PDI and Zeta potential of three drug-carrying

nanoparticles.

|                          | Size (nm)      | PDI         | Zeta(mV)        |
|--------------------------|----------------|-------------|-----------------|
| DP-IR808@PTX-R848 NPs    | 150.20 ± 1.89  | 0.10 ± 0.03 | -(16.50 ± 2.77) |
| DP@PTX-R848 NPs          | 131.30 ± 2.98  | 0.14 ± 0.02 | -(26.00 ± 4.55) |
| DP-IR808@PTX-R848-GA NPs | 167.90 ± 11.08 | 0.20 ± 0.03 | -(23.30 ± 2.40) |

**Table. S2.** The median survival time and the tumor-free survival percentage of each group at the end of observation (on the 90<sup>th</sup> d)

|                                | Median survival time (d) | Tumor-free survival percentage (%) |
|--------------------------------|--------------------------|------------------------------------|
| Saline                         | 18                       | 0                                  |
| PTX injection                  | 20                       | 0                                  |
| DP@PTX-R848 NPs                | 26                       | 28.57                              |
| DP-IR808@PTX-R848 NPs          | 48                       | 42.86                              |
| DP-IR808@PTX-R848-GA NPs + NIR | 72                       | 42.86                              |
| DP-IR808@PTX-R848 NPs + NIR    | >90                      | 57.14                              |
